# Supplementary material for: Designing heterostructured core@satellite Prussian Blue Analogue@Au–Ag nanoparticles: Effect on the magnetic properties and catalytic activity
Source: Royal Society of Chemistry journal article supplement (doi:10.1039/d1qi00008j), 2021-01-01
Supplement: d1qi00008j2.pdf [file d1qi00008j2.pdf]

## Supporting Information

### **Designing heterostructured core@satellites Prussian Blue Analogue@Au-Ag nanoparticles: effect on the magnetic properties and catalytic activity**

Ekaterina Mamontova,<sup>a</sup> María Rodríguez-Castillo,<sup>b</sup> Erwan Oliviero,<sup>a,c</sup> Yannick Guari,<sup>a</sup> Joulia Larionova<sup>\*a</sup>, Miguel Monge<sup>\*b</sup> and Jérôme Long<sup>\*a</sup>

- a. ICGM, Univ. Montpellier, CNRS, ENSCM, Montpellier, France.*
- b. Departamento de Química, Universidad de La Rioja, Centro de Investigación en Síntesis Química (CISQ), Complejo Científico-Tecnológico, 26004, Logroño, Spain.*
- c. MEA Plateform, Université de Montpellier, Montpellier, France.*

## Table of Contents

|                                                                                                                                                                                                                                                                                                                   |    |
|-------------------------------------------------------------------------------------------------------------------------------------------------------------------------------------------------------------------------------------------------------------------------------------------------------------------|----|
| Fig. S1. IR spectra of 1@Au-Ag (Top, Left) and comparison between IR spectra of 1, Au-Ag precursor and 1@Au-Ag (Top, Right). Bottom: magnification in the cyanide region. The two deconvoluted peaks are shown in purple whereas the cumulative fit appears as a dot green line.....                              | 3  |
| Fig. S2. PXRD patterns of 1 and 1@Au-Ag.....                                                                                                                                                                                                                                                                      | 4  |
| Fig. S3. TEM image and size distribution for 1.....                                                                                                                                                                                                                                                               | 4  |
| Fig. S4. 3D TEM reconstruction for 1@Au-Ag.....                                                                                                                                                                                                                                                                   | 5  |
| Fig. S5. Estimation of the SPR maximum wavelength for 1@Au-Ag by taking into account the NiCr PBA contribution to the electronic spectrum.....                                                                                                                                                                    | 5  |
| Fig. S6. Hysteresis loops for 1 and 1@Au-Ag at 2.5 K. For comparison, the data have been normalized with the values measured at 50 kOe ( $M_{sat}$ ).....                                                                                                                                                         | 6  |
| Fig. S7. Hysteresis loops for 1 and 1@Au-Ag at 2.5 K expressed as $\text{emu}\cdot\text{g}^{-1}$ .....                                                                                                                                                                                                            | 6  |
| Fig. S8. Temperature dependence of the in-phase ( $\chi'$ ) and out-of-phase ( $\chi''$ ) susceptibility components for 1.....                                                                                                                                                                                    | 7  |
| Fig. S9. Temperature dependence of the relaxation time for 1@Au-Ag. The red line represents the fit with an Arrhenius law.....                                                                                                                                                                                    | 7  |
| Fig. S10. Critical scaling law fitting for 1@Au-Ag.....                                                                                                                                                                                                                                                           | 8  |
| Fig. S11. Temperature dependence of the in-phase ( $\chi'$ ) and out-of-phase ( $\chi''$ ) susceptibility components at 100 Hz at various dc fields for 1@Au-Ag.....                                                                                                                                              | 8  |
| Fig. S12. Field dependence of the temperature maximum of $\chi''$ as a function of the magnetic field (Almeida–Thouless line) for 1@Au-Ag.....                                                                                                                                                                    | 9  |
| Fig S13. (Left) Time-dependent UV-Vis absorption spectra of 4-NP (400 nm) and 4-AP (295 nm) during reduction catalysed by 1* (* = in the experimental conditions reported by Lin and co-workers <sup>1</sup> ); (Right) Plot of $-\ln(C_t/C_0)$ as a function of time for reaction catalysed by 1*.....           | 9  |
| Fig S14. a) Time-dependent UV-Vis absorption spectra of 4-NP (400 nm) and 4-AP (295 nm) during reduction catalysed by 1 under a $\text{H}_2$ . b) Plot of the absorbance at 400 nm as a function of time. C) Plot of $-\ln(C_t/C_0)$ as a function of time for reaction catalysed by 1 under a $\text{H}_2$ ..... | 9  |
| Fig S15. Plot of $C_t/C_0$ as a function of time for reaction catalysed by 1@Au-Ag.....                                                                                                                                                                                                                           | 10 |
| Fig S16. (Left) Time-dependent UV-Vis absorption spectra of 4-NP (400 nm) and 4-AP (295 nm) during reduction catalysed by 1 under LED light irradiation; (Right) Plot of $-\ln(C_t/C_0)$ as a function of time for reaction catalysed by 1 under LED light irradiation.....                                       | 10 |
| Fig S17. Time-dependent UV-Vis absorption spectrum of the reduction of 4-NP (400 nm) and the formation of 4-AP (295 nm) measured for three reaction cycles illustrating the reusability of catalyst 1@Au-Ag.....                                                                                                  | 11 |
| Fig S18. TEM image of 1@Au-Ag after the first catalytic cycle of reduction of 4-NP, showing that the morphology of the nanostructure is preserved after catalysis.....                                                                                                                                            | 12 |
| References.....                                                                                                                                                                                                                                                                                                   | 12 |

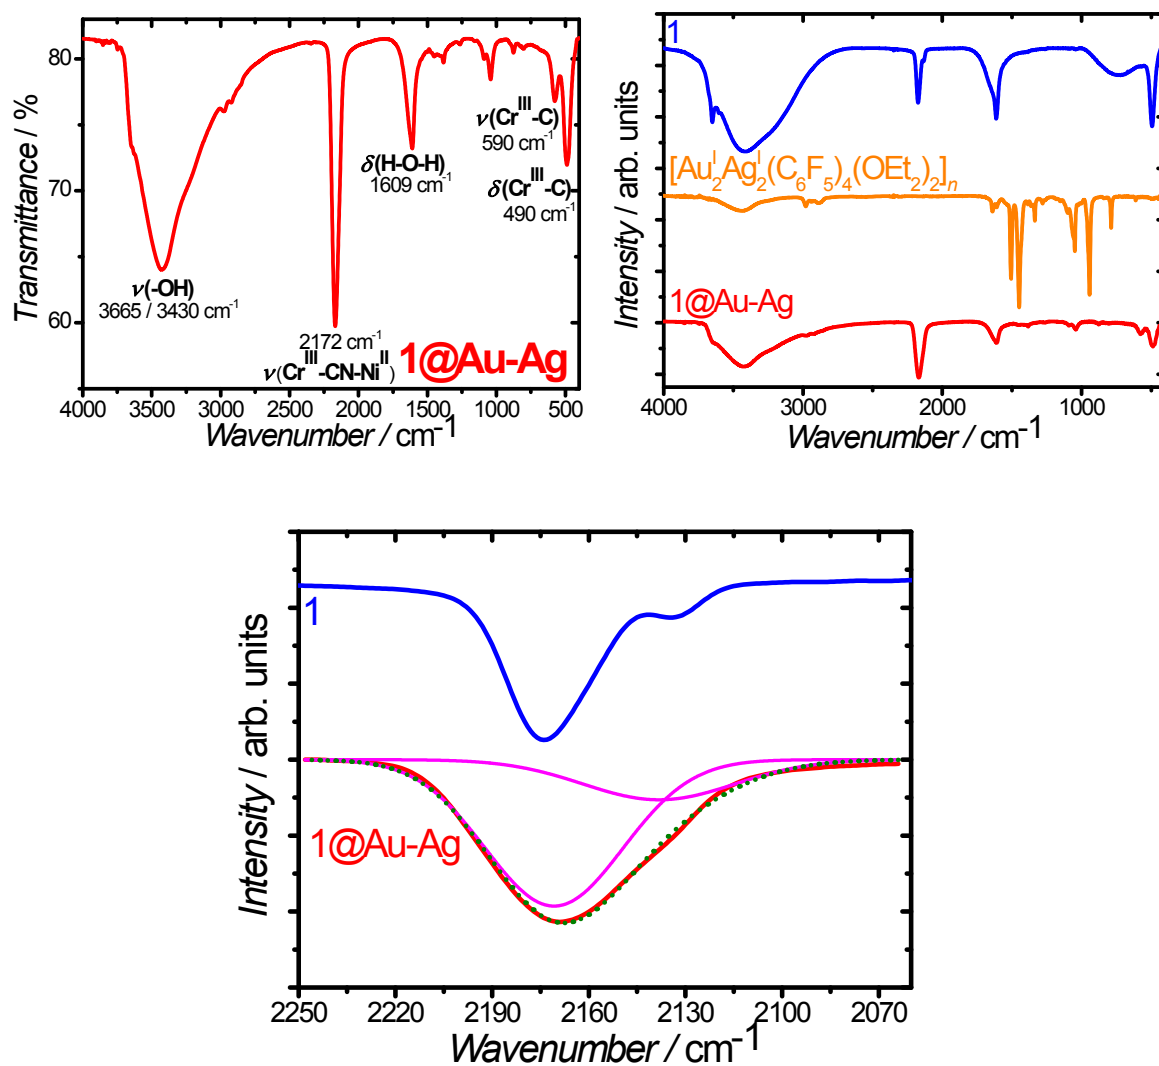

**Fig. S1.** IR spectra of **1@Au-Ag** (Top, Left) and comparison between IR spectra of **1**, Au-Ag precursor and **1@Au-Ag** (Top, Right). Bottom: magnification in the cyanide region. The two deconvoluted peaks are shown in purple whereas the cumulative fit appears as a dot green line.

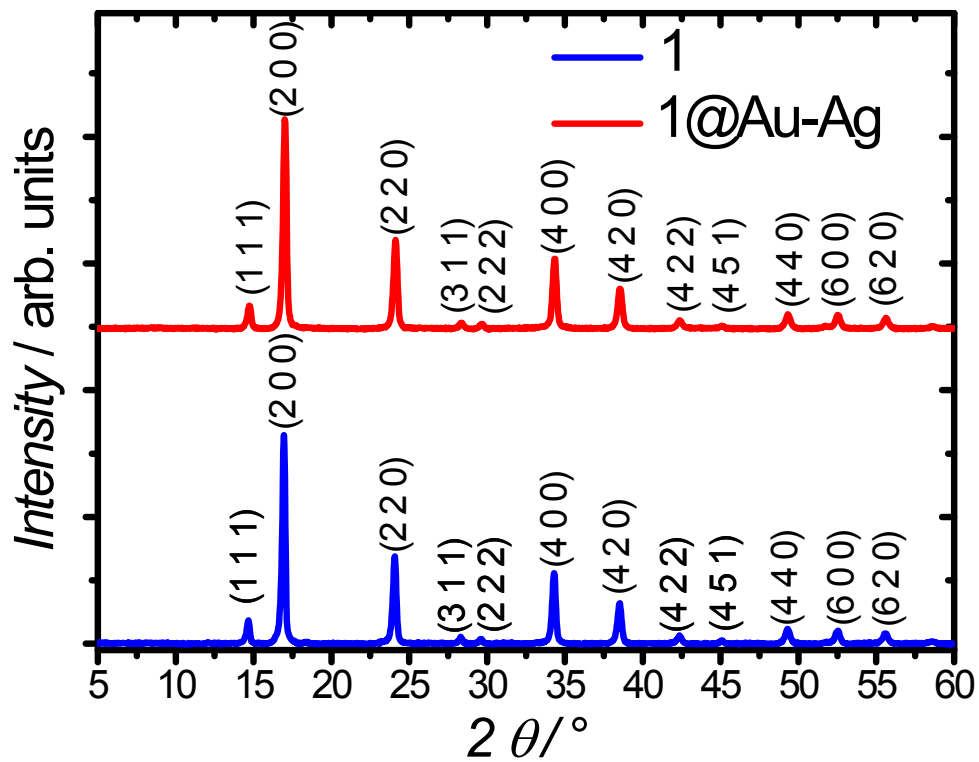

Fig. S2. PXRD patterns of 1 and 1@Au-Ag.

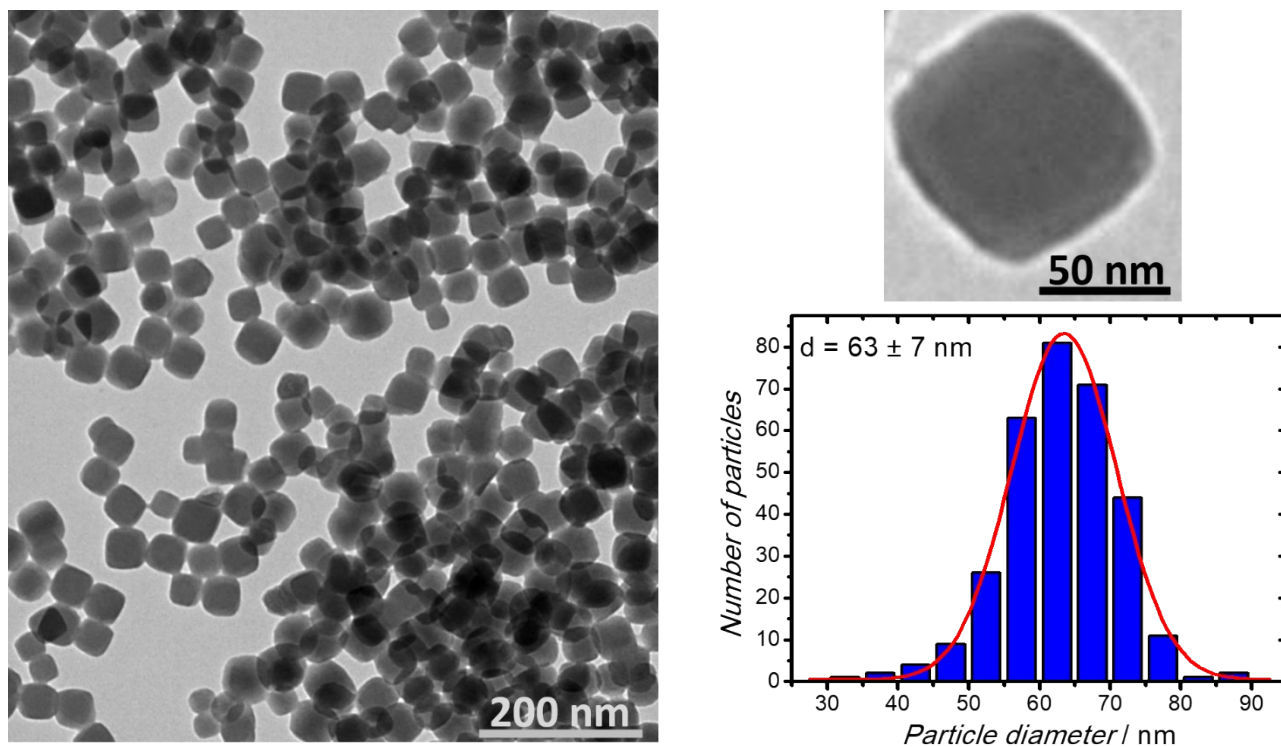

Fig. S3. TEM image and size distribution for 1.

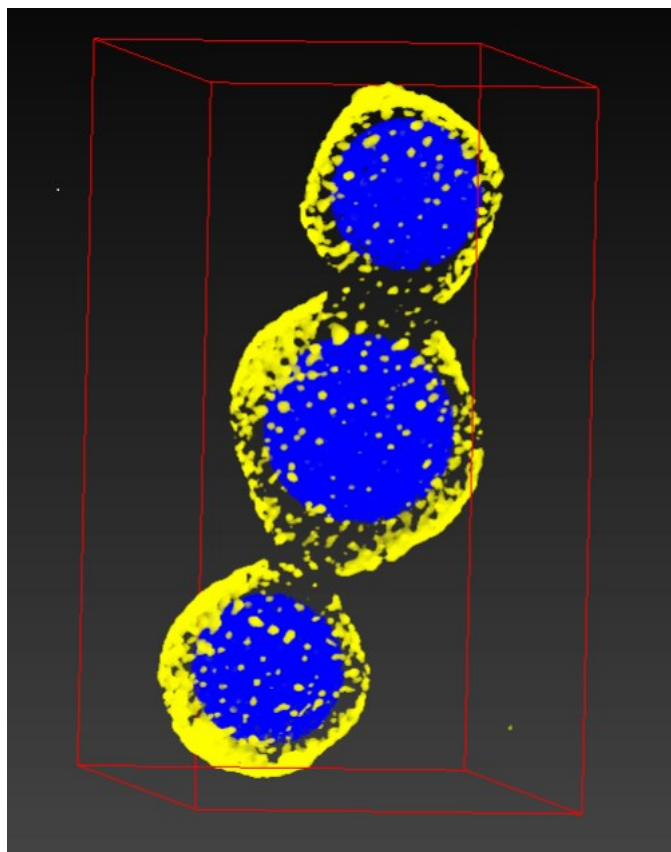

**Fig. S4.** 3D TEM reconstruction for **1@Au-Ag**.

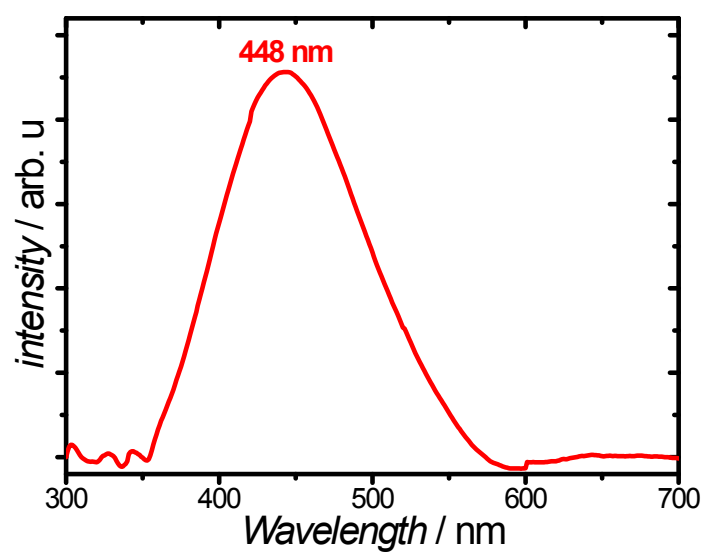

**Fig. S5.** Estimation of the SPR maximum wavelength for **1@Au-Ag** by taking into account the NiCr PBA contribution to the electronic spectrum.

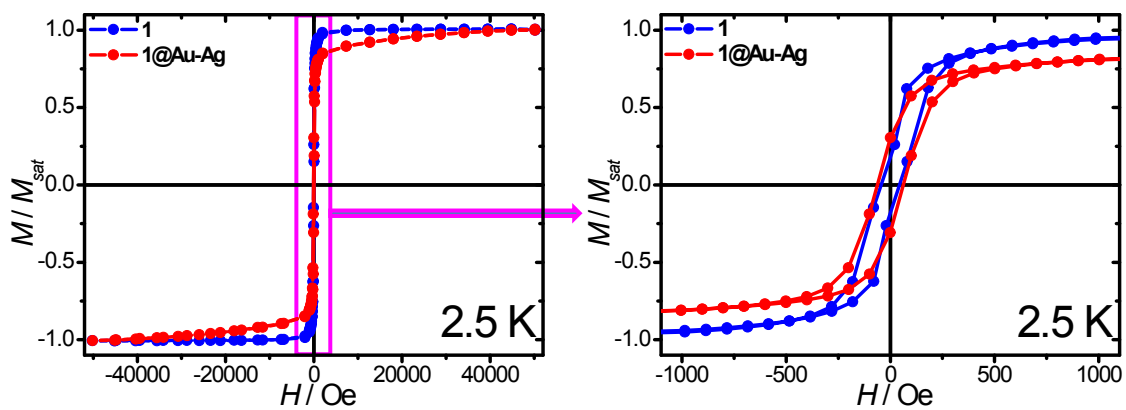

**Fig. S6.** Hysteresis loops for **1** and **1@Au-Ag** at 2.5 K. For comparison, the data have been normalized with the values measured at 50 kOe ( $M_{sat}$ ).

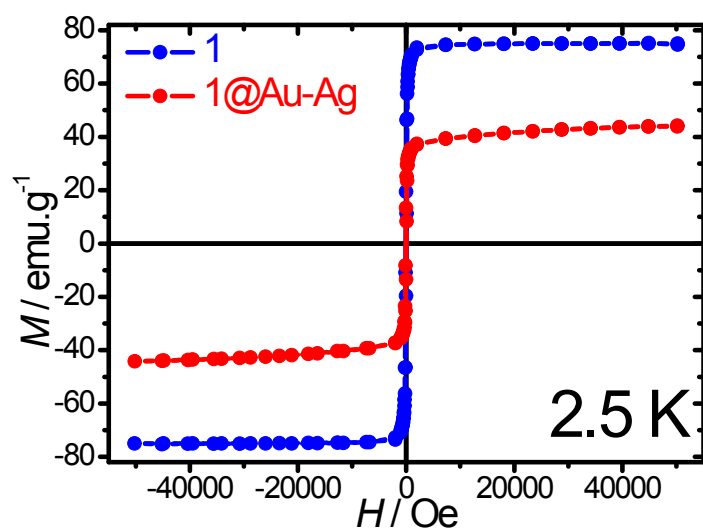

**Fig. S7.** Hysteresis loops for **1** and **1@Au-Ag** at 2.5 K expressed as  $\text{emu.g}^{-1}$ .

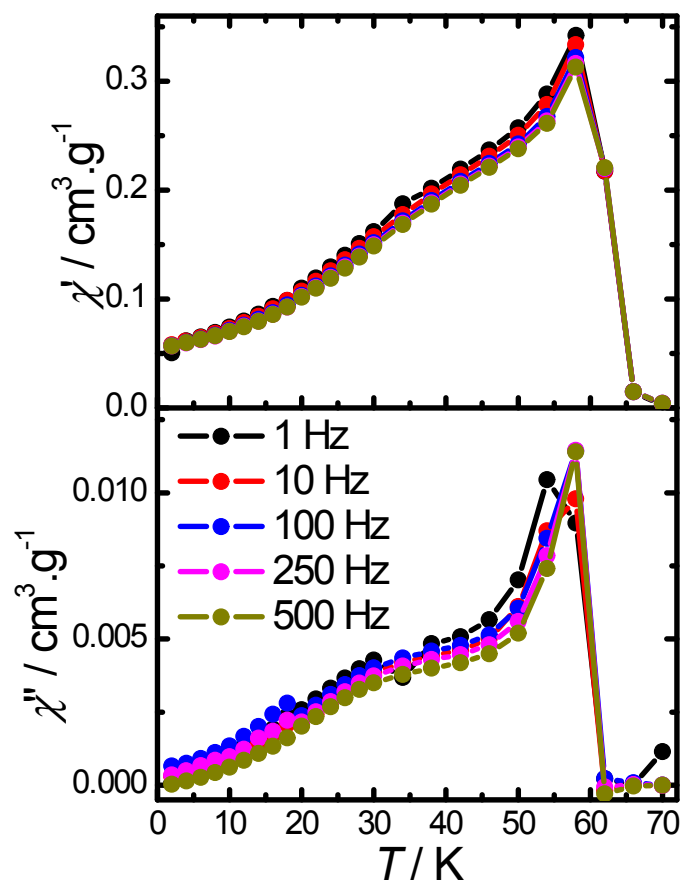

**Fig. S8.** Temperature dependence of the in-phase ( $\chi'$ ) and out-of-phase ( $\chi''$ ) susceptibility components for **1**.

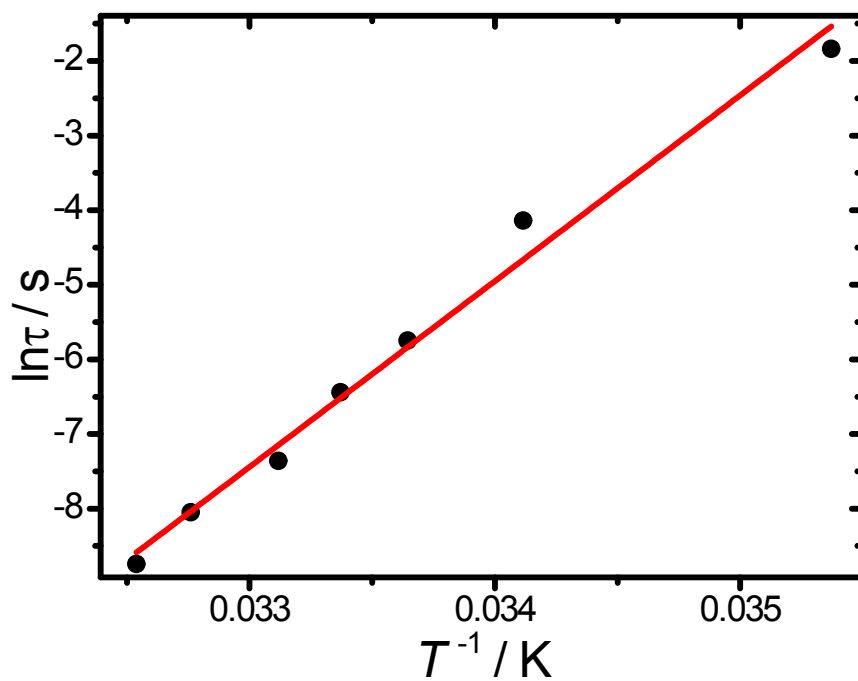

**Fig. S9.** Temperature dependence of the relaxation time for **1@Au-Ag**. The red line represents the fit with an Arrhenius law.

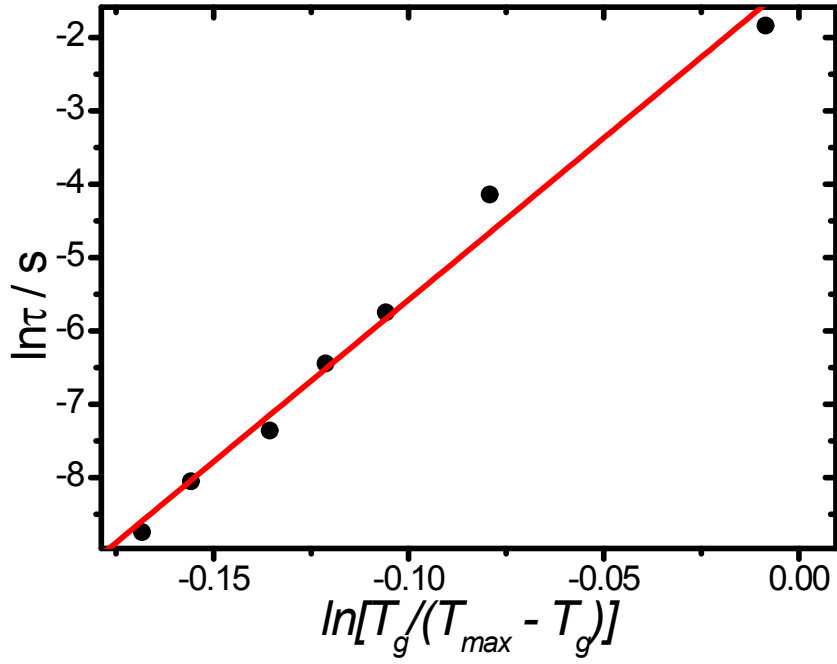

Fig. S10. Critical scaling law fitting for 1@Au-Ag.

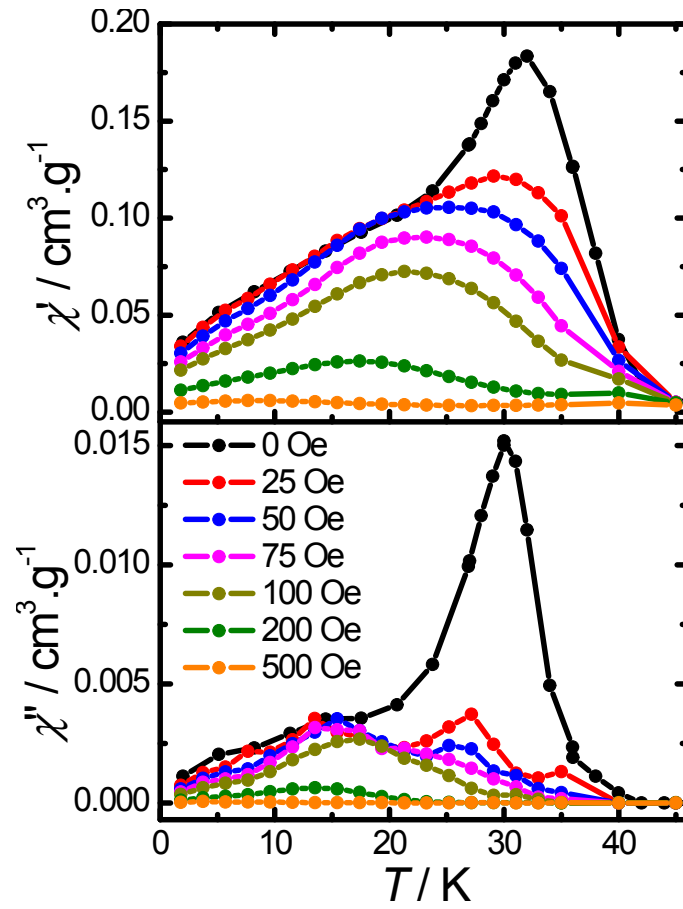

Fig. S11. Temperature dependence of the in-phase ( $\chi'$ ) and out-of-phase ( $\chi''$ ) susceptibility components at 100 Hz at various dc fields for 1@Au-Ag.



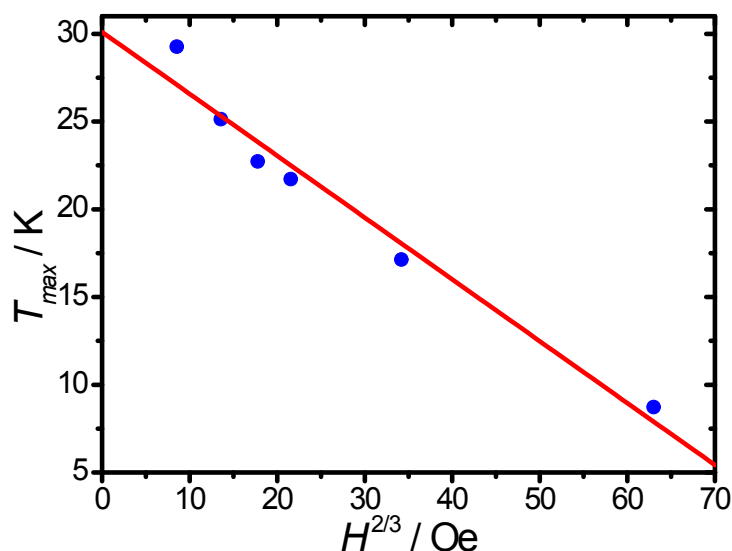

**Fig. S12.** Field dependence of the temperature maximum of  $\chi''$  as a function of the magnetic field (Almeida–Thouless line) for for **1@Au-Ag**.

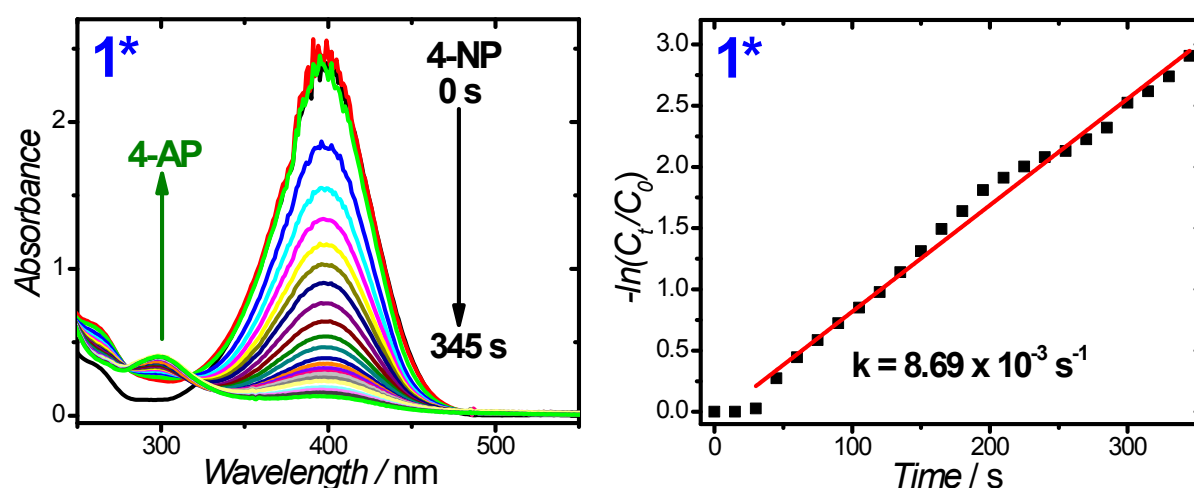

**Fig S13.** (Left) Time-dependent UV-Vis absorption spectra of 4-NP (400 nm) and 4-AP (295 nm) during reduction catalysed by **1\*** (\* = in the experimental conditions reported by Lin and co-workers<sup>1</sup>); (Right) Plot of  $-\ln(C_t/C_0)$  as a function of time for reaction catalysed by **1\***.

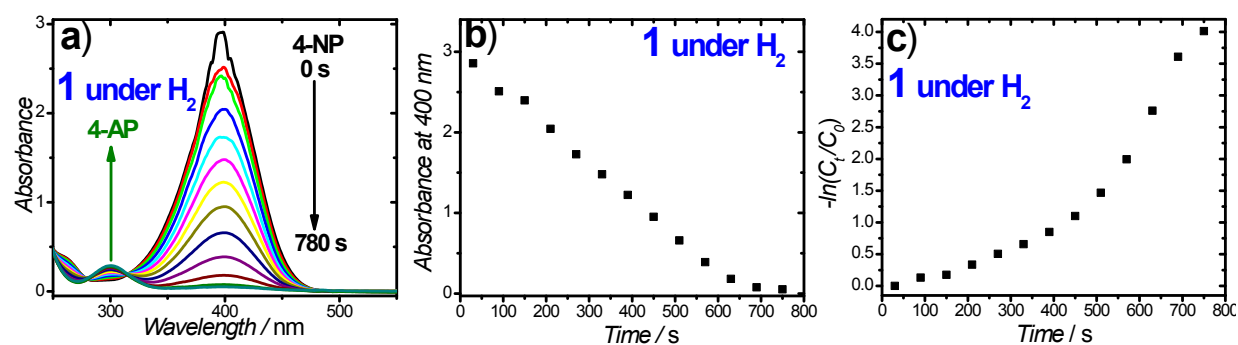

**Fig S14.** a) Time-dependent UV-Vis absorption spectra of 4-NP (400 nm) and 4-AP (295 nm) during reduction catalysed by **1** under  $H_2$ . b) Plot of the absorbance at 400 nm as a function of time. C) Plot of  $-\ln(C_t/C_0)$  as a function of time for reaction catalysed by **1** under  $H_2$ .

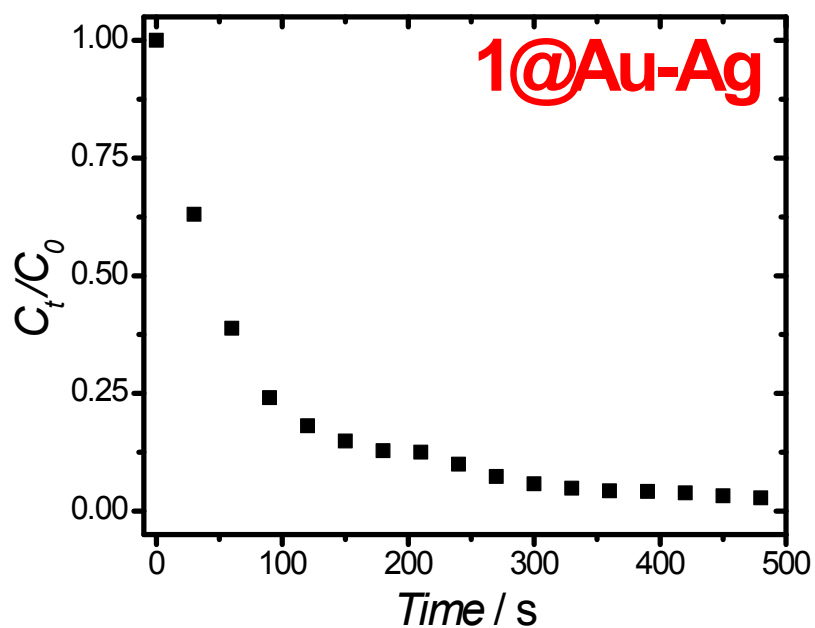

Fig S15. Plot of  $C_t/C_0$  as a function of time for reaction catalysed by 1@Au-Ag.

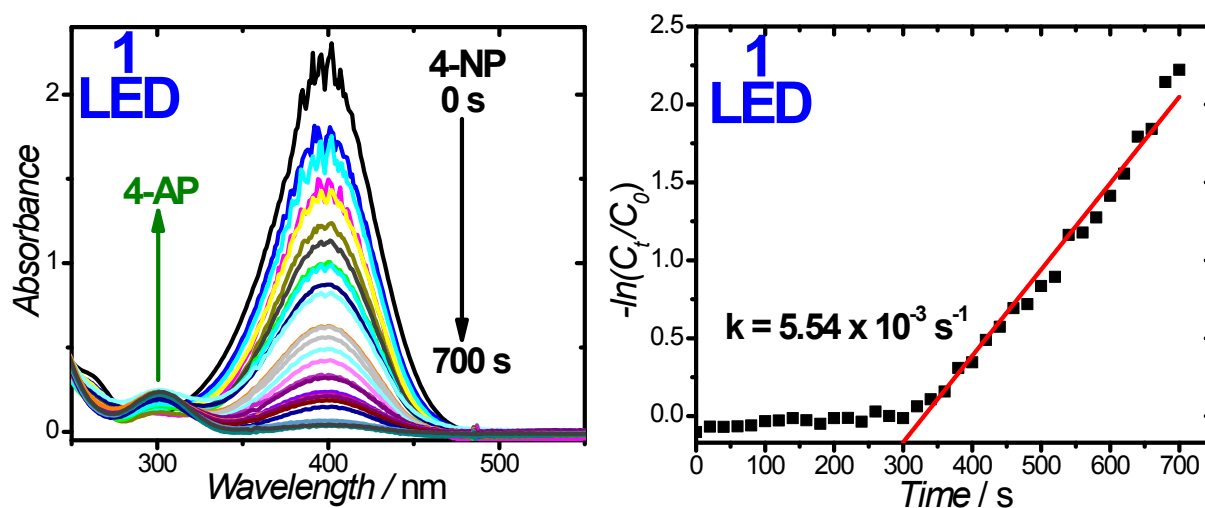

Fig S16. (Left) Time-dependent UV-Vis absorption spectra of 4-NP (400 nm) and 4-AP (295 nm) during reduction catalysed by 1 under LED light irradiation; (Right) Plot of  $-\ln(C_t/C_0)$  as a function of time for reaction catalysed by 1 under LED light irradiation.

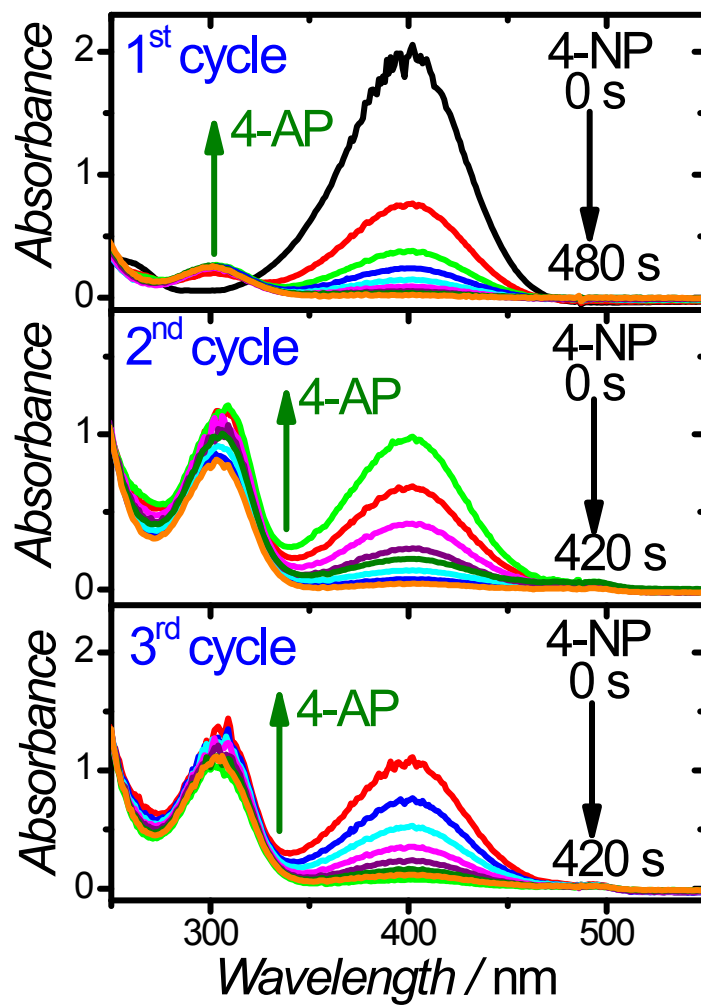

**Fig S17.** Time-dependent UV-Vis absorption spectrum of the reduction of 4-NP (400 nm) and the formation of 4-AP (295 nm) measured for three reaction cycles illustrating the reusability of catalyst **1@Au-Ag**.

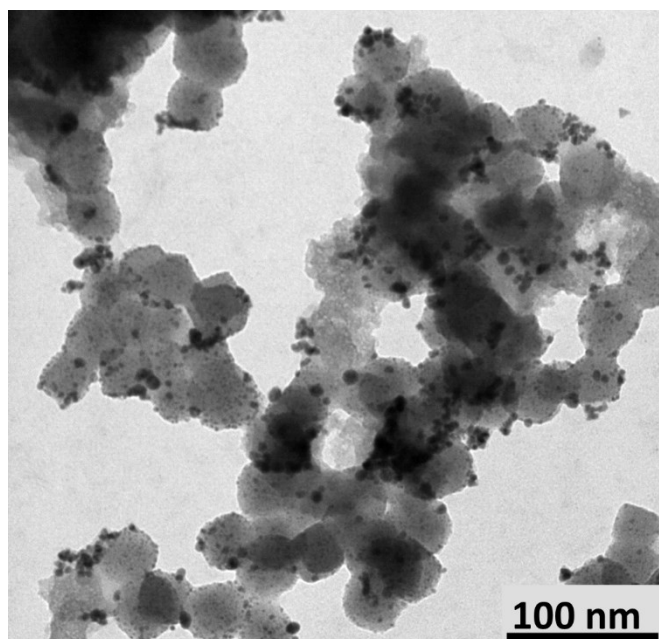

**Fig S18.** TEM image of **1@Au-Ag** after the first catalytic cycle of reduction of 4-NP, showing that the morphology of the nanostructure is preserved after catalysis.

#### References

- 1 T. Wi-Afedzi, F.-Y. Yeoh, M.-T. Yang, A. C. K. Yip and K.-Y. A. Lin, *Sep. Purif. Technol.*, 2019, **218**, 138-145.
